# Supplementary material
Source: Springer Nature journal article supplement (https://www.springermedizin.de/resource/supplementary/12885_2009_1959_MOESM3_ESM.pdf/9460186)

A

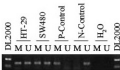

B

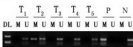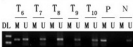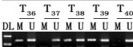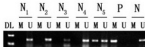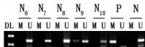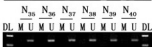

Supplement: MOESM3 [file 9460186]
